# Supplementary material for: Disaggregation-induced fluorescence enhancement of NIAD-4 for the optical imaging of amyloid-β fibrils
Source: Royal Society of Chemistry journal article supplement (doi:10.1039/c5cp02728d), 2015-01-01
Supplement: c5cp02728d1.pdf [file c5cp02728d1.pdf]

Supplementary information  
of  
Disaggregation-induced fluorescence  
enhancement of NIAD-4 upon interacting with  
amyloid- $\beta$  fibrils

---

Francesca Peccati,<sup>a</sup> Jordi Hernando,<sup>a</sup> Lluís Blancafort,<sup>b</sup> Xavier Solans-Monfort,<sup>a</sup>  
Mariona Sodupe<sup>a</sup>

<sup>a</sup> Departament de Química, Universitat Autònoma de Barcelona, Bellaterra, 08193, Spain.

<sup>b</sup> Institut de Química Computacional i Catàlisis, Campus Montilivi, Universitat de Girona,  
Girona, 17071, Spain

## Figures

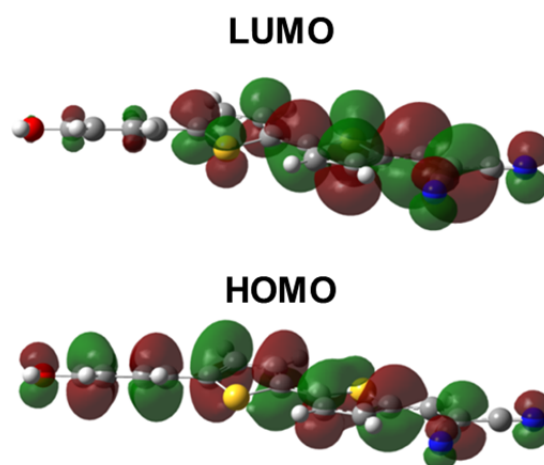

**Figure S1.** Molecular orbitals of NIAD-4 involved in the excitation responsible for fluoresce emission (HOMO and LUMO).

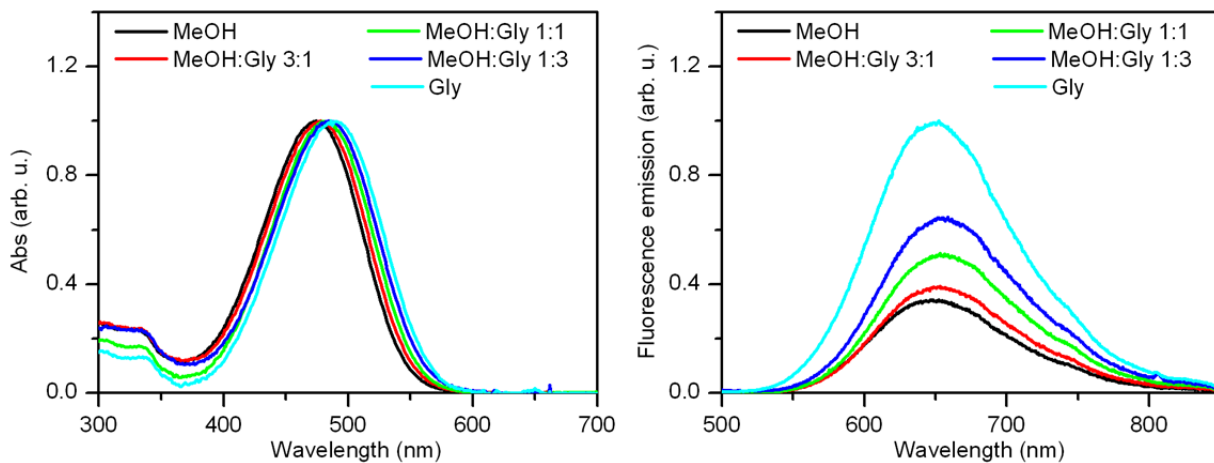

**Figure S2.** Absorption and fluorescence emission spectra of NIAD-4 in mixtures of MeOH and glycerol of increasing viscosity ( $C_{\text{NIAD-4}} = 5 \mu\text{M}$ ). All absorption spectra are normalized to their absorption maximum. Each fluorescence spectrum is normalized by the absorption at the excitation wavelength.

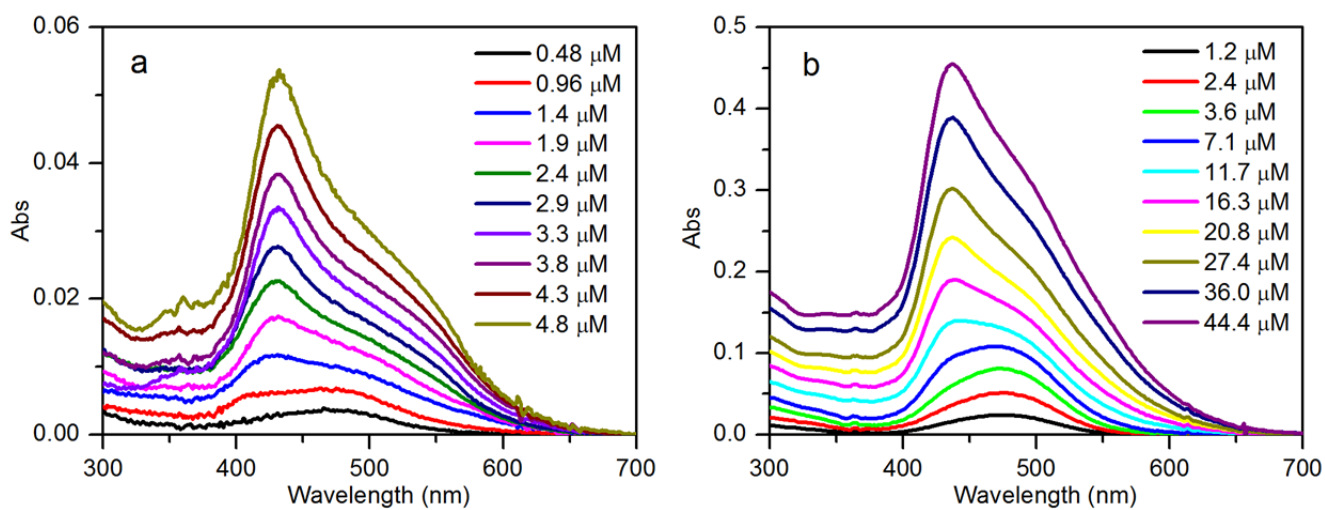

**Figure S3.** Concentration dependence of the absorption spectrum of NIAD-4 in (a)  $\text{H}_2\text{O}$  and (b)  $\text{H}_2\text{O}:\text{MeOH}$  2:1.

## Tables

**Table S1.** Excitation wavelengths (nm) corresponding to the first singlet excited state of the dye NIAD-4 calculated with different functionals and basis sets in gas phase and in aqueous solution (non-equilibrium LR-PCM).<sup>a</sup> Experimental value: 475 nm.<sup>b</sup>

| Method           | 6-31+G(d,p) gas | 6-31+G(d,p) | 6-311+G(2d,p) | 6-311+G(2d,p) |
|------------------|-----------------|-------------|---------------|---------------|
|                  | phase           | aq. sol.    | gas phase     | aq. sol.      |
| <b>PBE</b>       | 586             | 651         | 583           | 647           |
| <b>PBE0</b>      | 470             | 516         | 469           | 515           |
| <b>LC-PBE</b>    | 344             | 365         | 345           | 367           |
| <b>B3LYP</b>     | 493             | 543         | 490           | 540           |
| <b>CAM-B3LYP</b> | 405             | 438         | 404           | 438           |
| <b>BLYP</b>      | 591             | 655         | 587           | 650           |
| <b>BHandH</b>    | 408             | 442         | 409           | 442           |
| <b>M06</b>       | 476             | 521         | 472           | 516           |
| <b>M06-L</b>     | 550             | 606         | 545           | 599           |
| <b>M06-2X</b>    | 406             | 436         | 406           | 439           |

<sup>a</sup> Values corresponding to the excitation of the optimized geometry. <sup>b</sup> The experimental value refers to low concentration solutions, where the dye is predominantly in its monomeric form.

**Table S2.** State Specific (SS) correction to computed absorption and emission wavelengths (nm) of the most stable isomer A considering equilibrium (EQ) and non-equilibrium solvation regime (NEQ).

|                               |        | <b>water</b> | <b>methanol</b> | <b>dichlormethane</b> | <b>diethylether</b> |
|-------------------------------|--------|--------------|-----------------|-----------------------|---------------------|
| <b>Absorption<sup>a</sup></b> | LR NEQ | 439          | 438             | 440                   | 435                 |
|                               | SS NEQ | 447          | 446             | 449                   | 443                 |
| <b>Emission<sup>b</sup></b>   | LR EQ  | 625          | 620             | 598                   | 572                 |
|                               | SS NEQ | 554          | 553             | 534                   | 535                 |

<sup>a</sup> Computed at the optimized S<sub>0</sub> geometry.

<sup>b</sup> Computed at the optimized S<sub>1</sub> geometry.

**Table S3.** S<sub>1</sub> and T<sub>2</sub> energies at the S<sub>1</sub> optimized geometry (isomer **A**).

|                      | <b>TD</b> | <b>TDA</b> | <b>CAS(12,12)</b> | <b>CASPT2</b> | <b>MS-CASPT2</b> |
|----------------------|-----------|------------|-------------------|---------------|------------------|
| <b>S<sub>1</sub></b> | 2.43      | 2.64       | 2.91              | 2.49          | 2.57             |
| <b>T<sub>2</sub></b> | 2.05      | 2.34       | 2.57              | 2.79          | 2.99             |

**Table S4.** Gas phase CASSCF and MS-CASPT2 relative energies (eV) of singlet and triplet states of four geometries having different values of dihedral  $\Phi_2$ . The first singlet is the ground state.

| $\Phi_2=0^\circ$  |                 |                           |                           | $\Phi_2=20^\circ$ |                 |                           |                           |
|-------------------|-----------------|---------------------------|---------------------------|-------------------|-----------------|---------------------------|---------------------------|
| CAS<br>singlets   | CAS<br>triplets | MS-<br>CASPT2<br>singlets | MS-<br>CASPT2<br>triplets | CAS<br>singlets   | CAS<br>triplets | MS-<br>CASPT2<br>singlets | MS-<br>CASPT2<br>triplets |
| 0.00              | 1.24            | 0.00                      | 1.81                      | 0.00              | 1.33            | 0.00                      | 1.88                      |
| 2.91              | 2.57            | 2.57                      | 2.99                      | 3.01              | 2.55            | 2.68                      | 2.97                      |
| 3.66              | 3.79            | 3.41                      | 4.12                      | 3.73              | 3.79            | 3.43                      | 4.13                      |
| 4.25              | 3.97            | 3.67                      | 4.50                      | 4.33              | 4.01            | 3.65                      | 4.53                      |
| 4.91              | 4.37            | 4.55                      | 4.72                      | 4.97              | 4.35            | 4.61                      | 4.68                      |
| 5.27              | 4.88            | 4.79                      | 5.27                      | 5.32              | 4.89            | 4.85                      | 5.31                      |
| 5.43              |                 | 5.16                      |                           | 5.46              |                 | 5.14                      |                           |
| 5.66              |                 | 5.42                      |                           | 5.67              |                 | 5.46                      |                           |
| 5.85              |                 | 5.85                      |                           | 5.87              |                 | 5.86                      |                           |
| 6.28              |                 | 6.03                      |                           | 6.29              |                 | 6.05                      |                           |
| 6.48              |                 | 6.31                      |                           | 6.52              |                 | 6.29                      |                           |
| 6.54              |                 | 6.65                      |                           | 6.56              |                 | 6.67                      |                           |
| $\Phi_2=30^\circ$ |                 |                           |                           | $\Phi_2=40^\circ$ |                 |                           |                           |
| CAS<br>singlets   | CAS<br>triplets | MS-<br>CASPT2<br>singlets | MS-<br>CASPT2<br>triplets | CAS<br>singlets   | CAS<br>triplets | MS-<br>CASPT2<br>singlets | MS-<br>CASPT2<br>triplets |
| 0.00              | 1.33            | 0.00                      | 1.88                      | 0.00              | 0.99            | 0.00                      | 2.05                      |
| 3.01              | 2.55            | 2.68                      | 2.97                      | 3.26              | 1.92            | 2.61                      | 2.88                      |
| 3.73              | 3.79            | 3.43                      | 4.13                      | 3.75              | 3.22            | 3.50                      | 4.09                      |
| 4.33              | 4.01            | 3.65                      | 4.53                      | 4.77              | 3.53            | 3.85                      | 4.54                      |
| 4.97              | 4.35            | 4.61                      | 4.68                      | 5.24              | 3.72            | 4.43                      | 4.61                      |
| 5.32              | 4.89            | 4.85                      | 5.31                      | 5.59              | 4.34            | 4.86                      | 5.37                      |
| 5.46              |                 | 5.14                      |                           | 5.71              |                 | 5.10                      |                           |
| 5.67              |                 | 5.46                      |                           | 5.90              |                 | 5.21                      |                           |
| 5.87              |                 | 5.86                      |                           | 6.03              |                 | 5.52                      |                           |
| 6.29              |                 | 6.05                      |                           | 6.13              |                 | 5.95                      |                           |
| 6.52              |                 | 6.29                      |                           | 6.23              |                 | 6.31                      |                           |
| 6.56              |                 | 6.67                      |                           | 6.65              |                 | 6.49                      |                           |



**Table S5.** Dependence of the optical properties of NIAD-4 with solvent viscosity in mixtures of methanol and glycerol.

| Solvent      | Viscosity (cP) <sup>a</sup> | $\epsilon$ | $\lambda_{\max, \text{abs}}$ (nm) | $\lambda_{\max, \text{fl}}$ (nm) | $\Phi_{\text{fl}}$ |
|--------------|-----------------------------|------------|-----------------------------------|----------------------------------|--------------------|
| MeOH         | 0.59                        | 31.0       | 474                               | 646                              | 0.14               |
| MeOH:Gly 3:1 | 4.0                         | 33.9       | 478                               | 653                              | 0.16               |
| MeOH:Gly 1:1 | 28                          | 36.2       | 484                               | 653                              | 0.21               |
| MeOH:Gly 1:3 | 170                         | 38.0       | 485                               | 653                              | 0.27               |
| Gly          | 1182                        | 39.4       | 486                               | 652                              | 0.427              |

<sup>a</sup> Levitt, J. A.; Kuimova, M. K.; Yahioglu, G.; Chung, P.-H.; Suhling, K.; Phillips, D. *J. Phys. Chem. C* **2009**, *113*, 11634
